# Supplementary material
Source: publisher figshare collection journal article supplement (https://tandf.figshare.com/ndownloader/files/21725928)
Supplement: Supplementary file 1 [file 21725928]

**Supplementary figure 1**

**
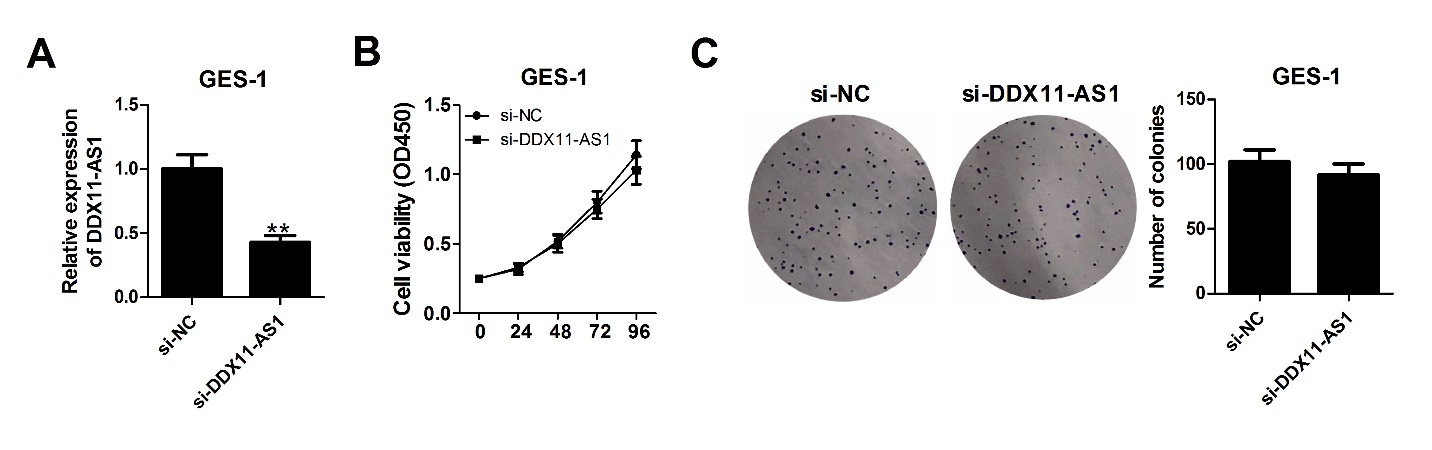
**

**Supplemental Figure 1. Effect of DDX11-AS1 knockdown on the proliferation of normal gastric epithelium cells GES-1.** (A) DDX11-AS1 expression in GES-1 cells after transfection with si-DDX11-AS1. (B and C) CCK-8 assay and clone formation assay were used to determine the effect of DDX11-AS1 knockdown on GES-1 cell proliferation.
